# Supplementary material for: Preparation of a ROMP-type imidazolium-functionalized norbornene ionic liquid block copolymer and the electrochemical property for lithium-ion batteries polyelectrolyte membranes
Source: Royal Society of Chemistry journal article supplement (doi:10.1039/c5ra04860e), 2015-01-01
Supplement: c5ra04860e1.pdf [file c5ra04860e1.pdf]

## Supplementary Information for

### Preparation of ROMP-type Imidazolium-Functionalized Norbornene Ionic Liquid Block Copolymer and Electrochemical Property for Lithium-ion Battery Polyelectrolyte Membranes

Juan Wang<sup>1</sup>, Xiaohui He<sup>1,2\*</sup>, Hongyu Zhu<sup>1</sup>, and Defu Chen<sup>3</sup>

<sup>1</sup>School of Materials Science and Engineering, Nanchang University, 999 Xuefu  
Avenue, Nanchang 330031, China

<sup>2</sup>Jiangxi Provincial Key Laboratory of New Energy Chemistry, Nanchang University,  
999 Xuefu Avenue, Nanchang 330031, China

<sup>3</sup>School of Civil Engineering and Architecture, Nanchang University, 999 Xuefu  
Avenue, Nanchang 330031, China

#### Determination of PIL block composition ratios by <sup>1</sup>H NMR Analyses.

The PIL block composition ratios were determined to compare the integrating of polymer backbone and imidazolium block by <sup>1</sup>H NMR analyses. The (CH) of imidazolium protons peaks for the ionic block(n) appear at 8.70 ppm (signal 5 in **Fig. S1–S5**) look as integrate 1. Backbone protons peaks for two block (m&n) appear at between 5.50-5.13 ppm (signal 7 in **Fig. S1–S5**) (see **Eq. S1**). There are four methylene protons peaks of alkyl chain adjacent to the ester and N of imidazolium respectively and three methyl protons peaks of imidazolium ring appeared at 4.25-3.75 ppm (signal (6+9) in **Fig. S1–S5**) for PIL block (see **Eq. S2**).

$$2m + 2n = 7 \text{ } ^1\text{H NMR integration} \quad (\text{Eq. S1})$$

$$7n = (6+9) \text{ } ^1\text{H NMR integration} \quad (\text{Eq. S2})$$

Using the two equations can calculated m and n, each PIL block composition ratios for copolymers 5-9 can be quantified as below:

(1) PIL block composition ratios for copolymer 5 (**Fig. S1**):

$$2m + 2n = 6.96$$

$$7n = 5.08$$

---

\* Correspondence to: Xiaohui He, School of Materials Science and Engineering, Nanchang University, Nanchang 330031, China. Email: [hexiaohui@ncu.edu.cn](mailto:hexiaohui@ncu.edu.cn) (X. He)

$$m = 1.00, n = 0.27$$

$$m : n_{\text{calc.}} = 1 : 0.27$$

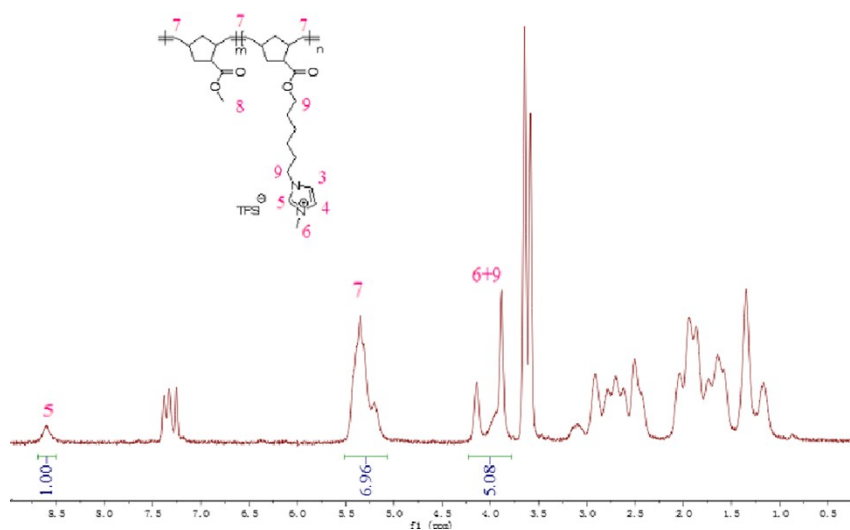

**Fig. S1.**  $^1\text{H}$  NMR spectrum of copolymer 5 and the  $^1\text{H}$  NMR peak integrated for calculating the PIL block Composition ratios in 5.

(2) PIL block composition ratios for copolymer 6 (**Fig. S2**):

$$2m + 2n = 6.46$$

$$7n = 5.49$$

$$m = 1.00, n = 0.32$$

$$m : n_{\text{calc.}} = 1 : 0.32$$

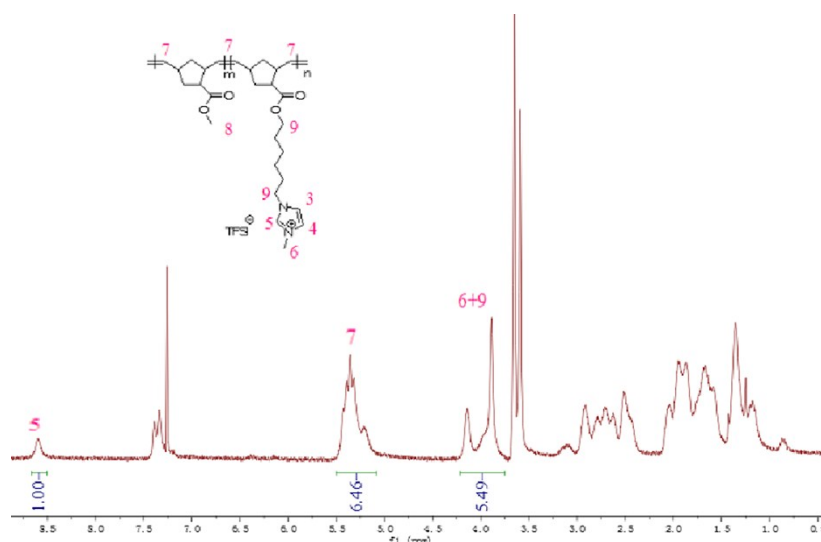

**Fig. S2.**  $^1\text{H}$  NMR spectrum of copolymer 6 and the  $^1\text{H}$  NMR peak integrated for calculating the PIL block composition ratios in 6.

(3) PIL block composition ratios for copolymer 7 (**Fig. S3**):

$$2m + 2n = 4.76$$

$$7n = 5.18$$

$$m = 1.00, n = 0.45$$

$$m : n_{\text{calc.}} = 1 : 0.45$$

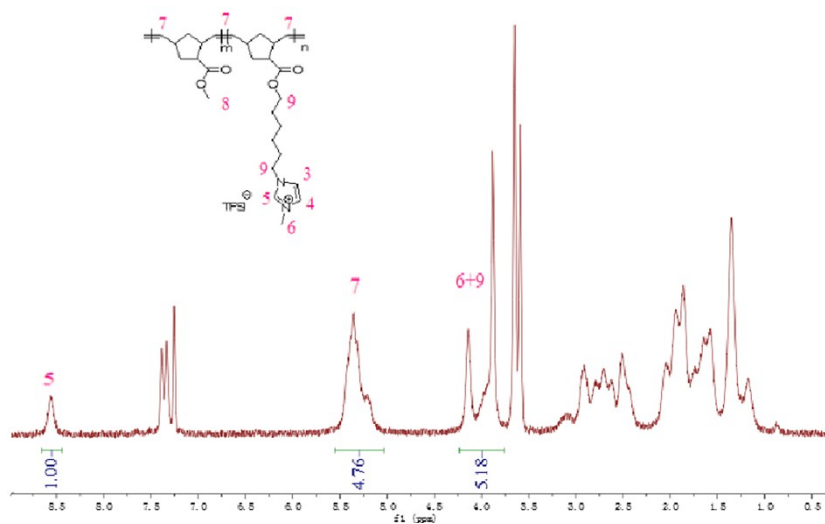

**Fig. S3.**  $^1\text{H}$  NMR spectrum of copolymer 7 and the  $^1\text{H}$  NMR peak integrated for calculating the PIL block composition ratios in 7.

(4) PIL block composition ratios for copolymer 8 (**Fig. S4**):

$$2m + 2n = 4.53$$

$$7n = 6.13$$

$$m = 1.00, n = 0.63$$

$$m : n_{\text{calc.}} = 1 : 0.63$$

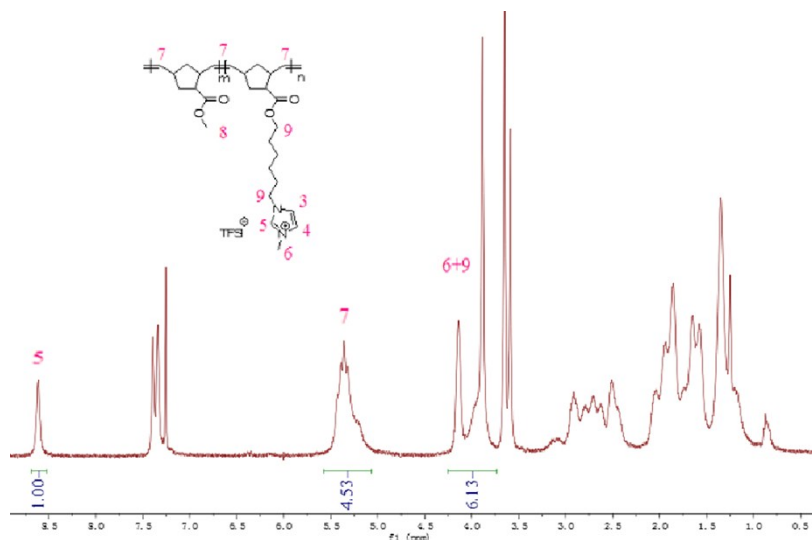

**Fig. S4.**  $^1\text{H}$  NMR spectrum of copolymer 8 and the  $^1\text{H}$  NMR peak integrated for

calculating the PIL block composition ratios in 8.

(5) PIL block composition ratios for copolymer 9 (**Fig. S5**):

$$2m + 2n = 3.23$$

$$7n = 5.70$$

$$m = 1.00, n = 1.03$$

$$m : n_{\text{calc.}} = 1 : 1.03$$

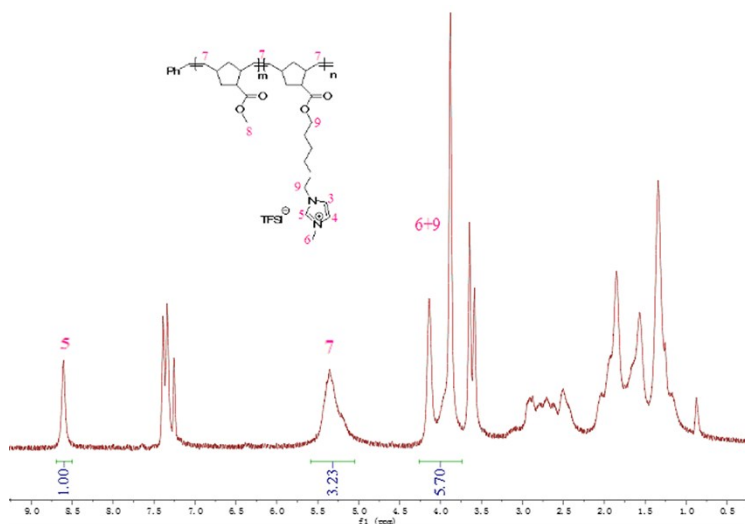

**Fig. S5.** <sup>1</sup>H NMR spectrum of copolymer 9 and the <sup>1</sup>H NMR peak integrated for calculating the PIL block composition ratios in 9.

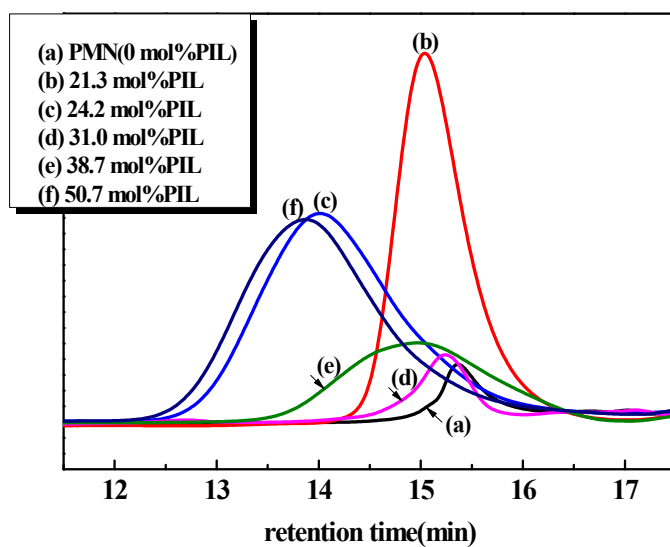

**Fig. S6.** GPC curves of all block copolymers
